# Supplementary material
Source: bioRxiv or medRxiv preprint supplement (https://www.biorxiv.org/highwire/filestream/95377/field_highwire_adjunct_files/2/308296-3.pdf)

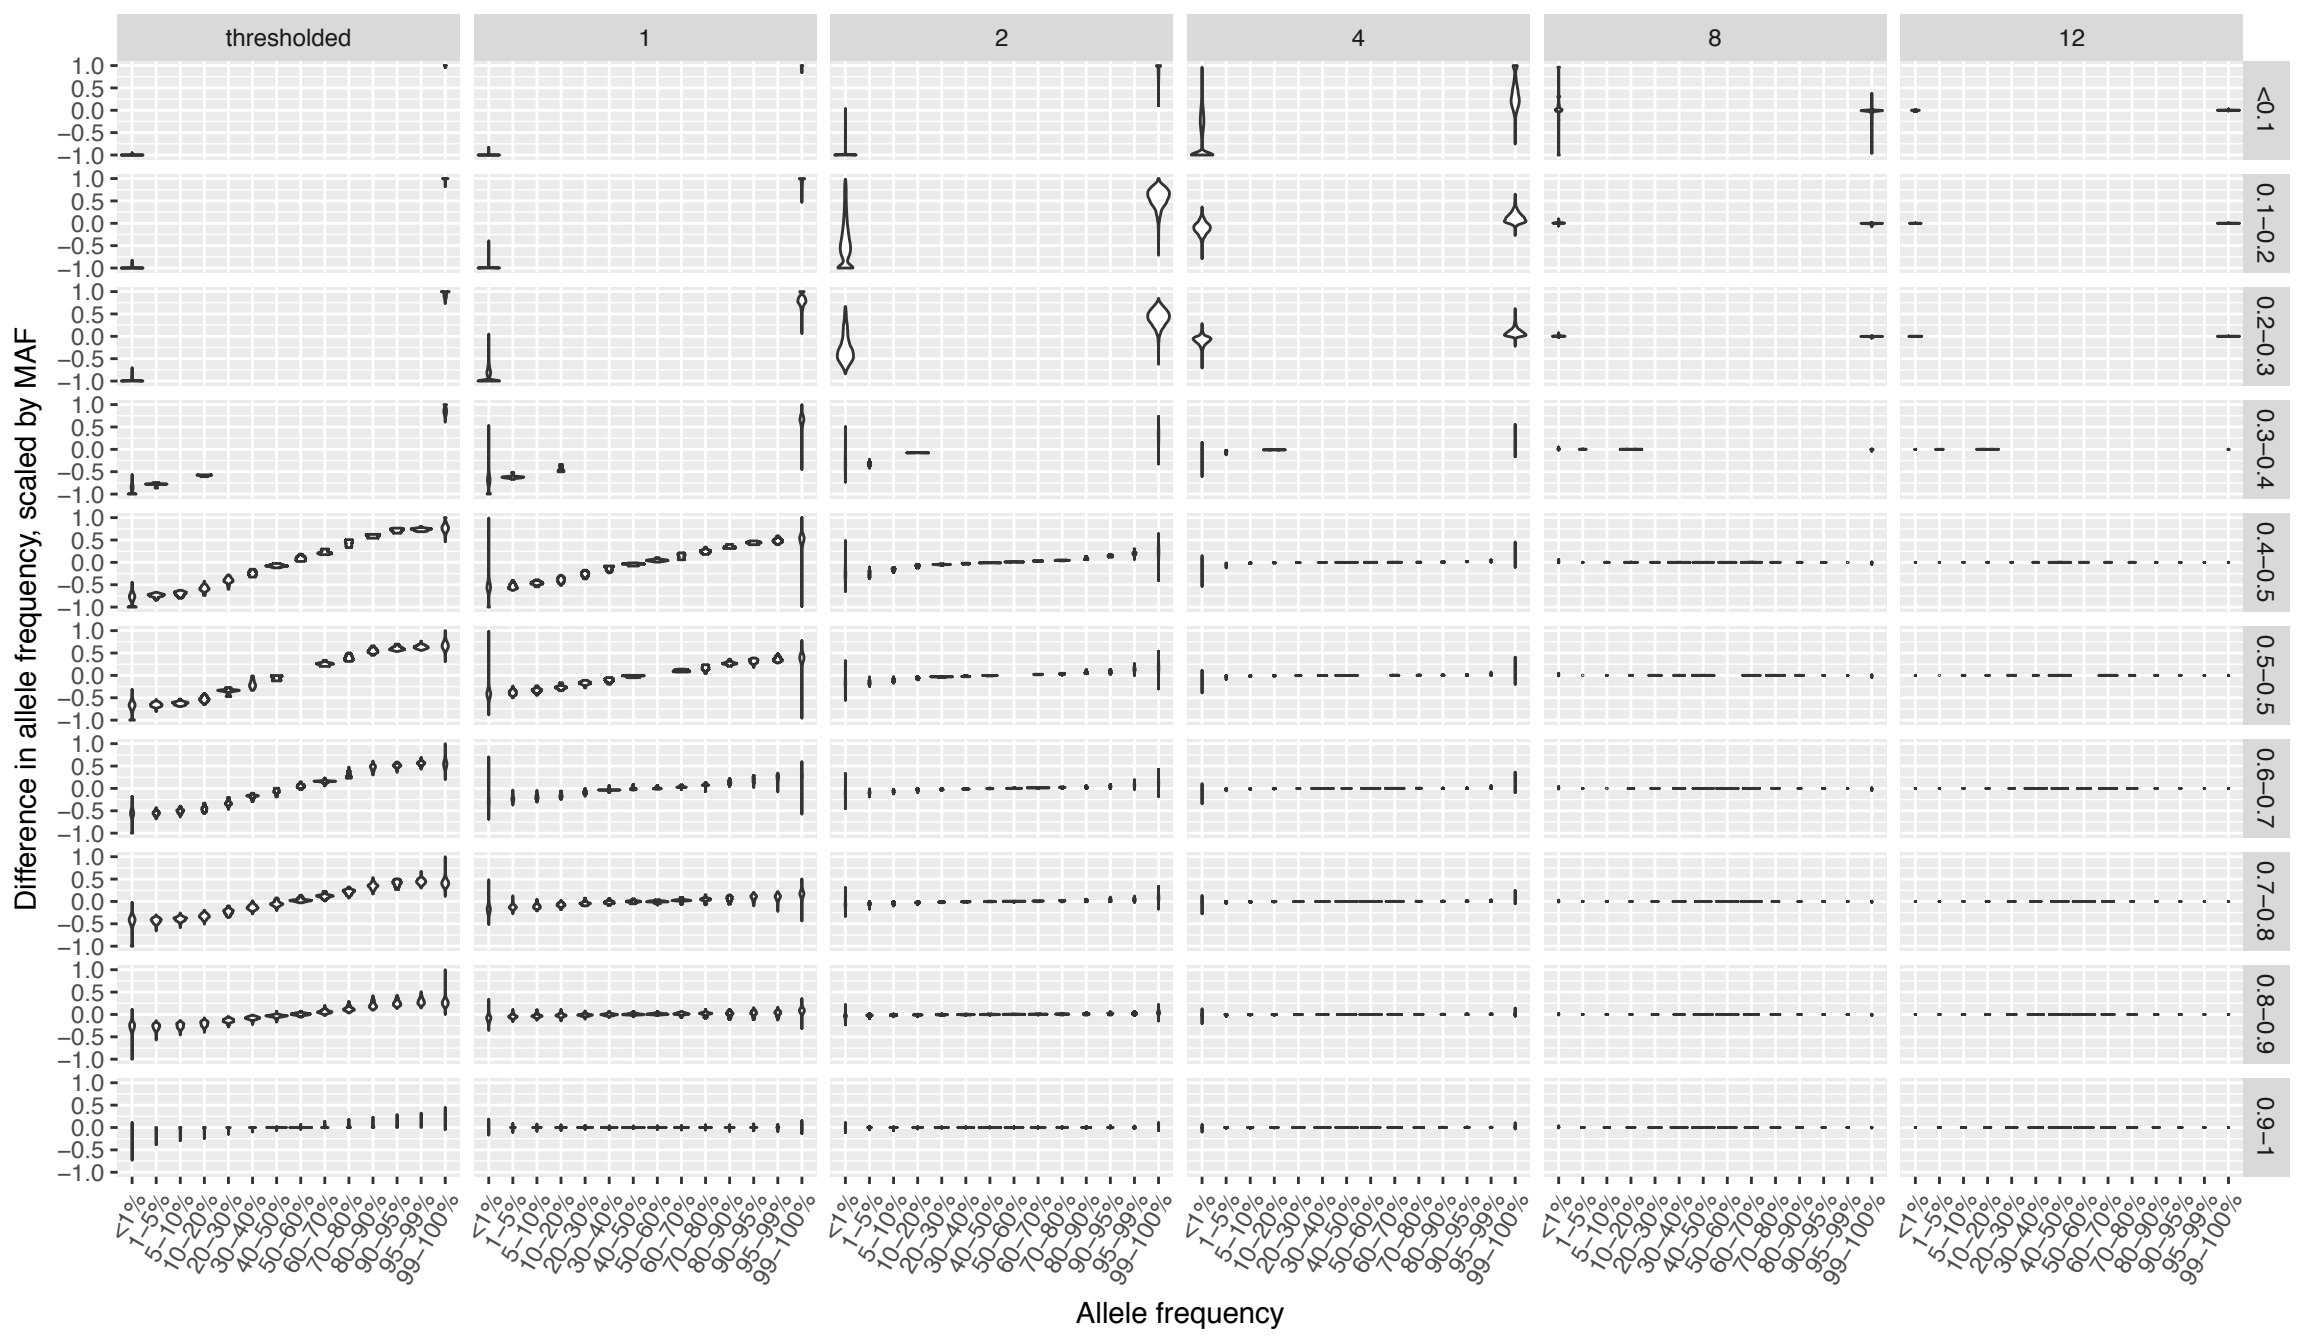

Supplement: Supplementary file [file 308296-3.pdf]
